# Supplementary material for: Synthesis of a graphitized hierarchical porous carbon material supported with a transition metal for electrochemical conversion
Source: Royal Society of Chemistry journal article supplement (doi:10.1039/d1qi01561c), 2022-01-01
Supplement: d1qi01561c1.pdf [file d1qi01561c1.pdf]

## Synthesis of graphitized hierarchical porous carbon supported transition-metal for electrochemical conversion

Fangfang Chang,<sup>a,b</sup> Yanfu Ma,<sup>a</sup> Panpan Su,<sup>\*a</sup> Jian Liu<sup>\*a,c</sup>

*a. State Key Laboratory of Catalysis, Dalian Institute of Chemical Physics, Chinese Academy of Sciences, 457 Zhongshan Road, Dalian 116023, Liaoning, China.*

*b. University of Chinese Academy of Sciences, 19A Yuquan Road, Beijing 100049, China.*

*c. DICP-Surrey Joint Centre for Future Materials, Department of Chemical and Process Engineering, University of Surrey, Guildford, Surrey GU2 7XH, U.K.*

Email: [panpansu@dicp.ac.cn](mailto:panpansu@dicp.ac.cn); [jian.liu@surrey.ac.uk](mailto:jian.liu@surrey.ac.uk); [jianliu@dicp.ac.cn](mailto:jianliu@dicp.ac.cn).

### Preparation of Ni/NC for TPD

The Ni/NC material was prepared using the same procedure with ho-Ni/NC just tuning the pyrolysis temperature to 700 °C. We choose this temperature for ensuring the carbon supported with metal atoms was obtained.

### Preparation of hi-Ni/NC with different shell thickness

hi-Ni/NC(0.3) and hi-Ni/NC(0.4) samples were synthesized using the same method with hi-Ni/NC except that the amount of CaCO<sub>3</sub> template to 0.3 g and 0.4 g, respectively.

### Measurement of electrochemical performance:

A platinum wire and Ag/AgCl electrode were counter and reference electrode, respectively. The catalyst-coated rotating ring-disk electrode (RRDE) were used as the working electrode. The catalytic ink was obtained by dispersing the catalysts (3 mg) in EtOH (120 μL) and 5 wt % Nafion solution (30 μL). Then the ink (7 μL) dropped cast on the RRDE electrode to form a thin film. Cyclic voltammetry (CV) and linear sweep voltammetry (LSV) of prepared catalysts were conducted in O<sub>2</sub>-saturated 0.1 M KOH (0.1 M HClO<sub>4</sub>) solution. The kinetic process was obtained from Koutecky-Levich equation:

$$\frac{1}{J} = \frac{1}{J_L} + \frac{1}{J_K} = \frac{1}{B\omega^{1/2}} + \frac{1}{J_K} \quad (1)$$

$$B = 0.62nFC_0D_0^{2/3}V^{-1/6} \quad (2)$$

where  $\omega$  is the angular velocity of the disk.  $J$ ,  $J_k$  and  $J_L$  present the measured, kinetic and limiting diffusion current densities, respectively.  $n$  is the electron transfer number.  $F$  is the Faraday constant (96485 C mol<sup>-1</sup>).  $C_0$  is the O<sub>2</sub> concentration (1.2 × 10<sup>-6</sup> mol·cm<sup>-3</sup>).  $D_0$  is the diffusion coefficient (1.9 × 10<sup>-5</sup> cm<sup>2</sup>·s<sup>-1</sup>), and  $V$  is the kinematic viscosity (0.01 cm<sup>2</sup>·s<sup>-1</sup>) in the 0.1 M KOH solution.

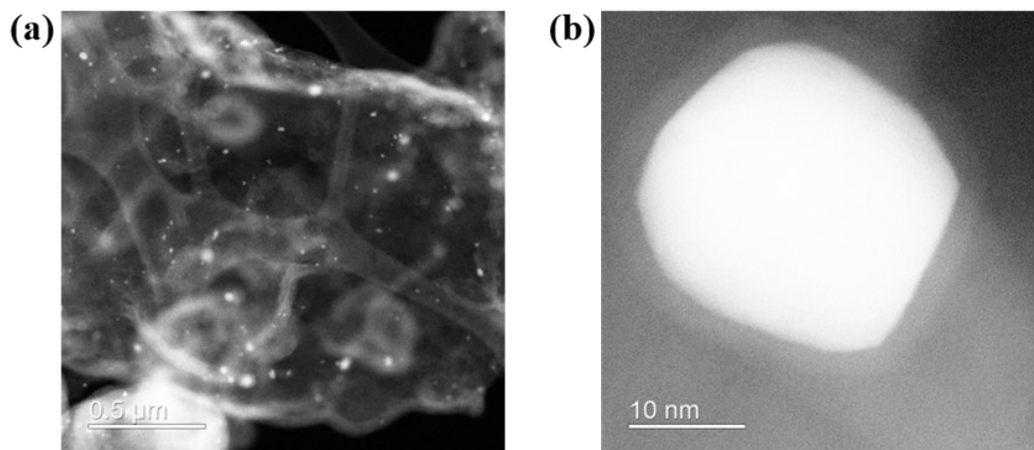

**Fig. S1** The HAADF-TEM images of hi-Ni/NC at low (a) and high (b) magnifications.

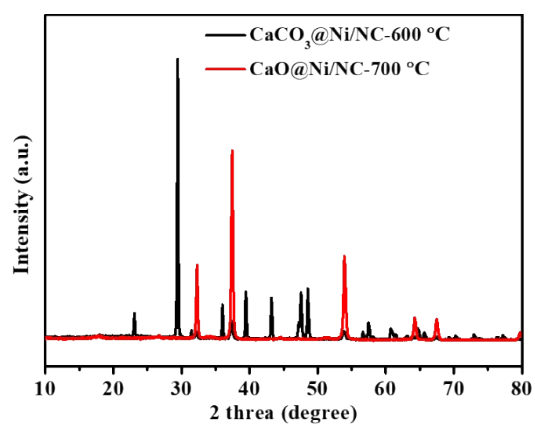

**Fig. S2** The XRD patterns of CaCO<sub>3</sub>@Ni/NC-600°C and CaO@Ni/NC-700°C.

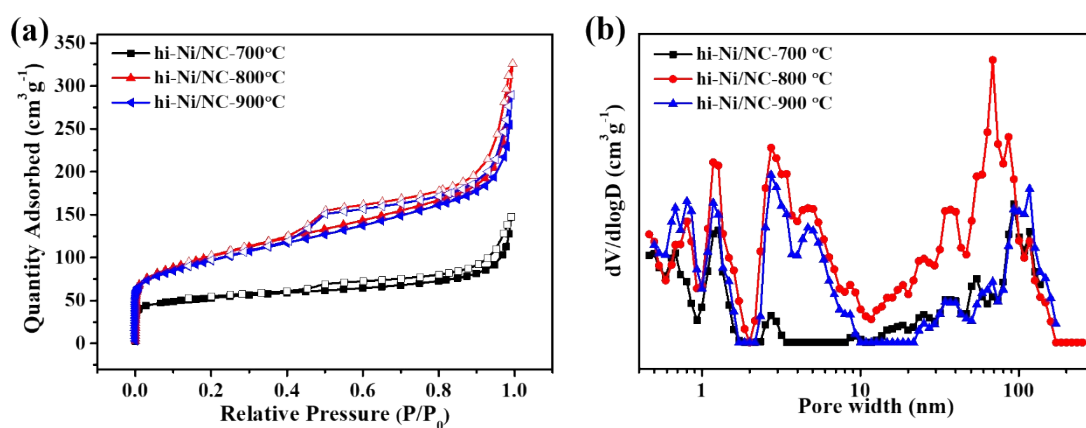

**Fig. S3** The  $N_2$  adsorption-desorption isotherms (a) and the pore size distribution (b) of hi-Ni/NC-700°C, hi-Ni/NC-800°C and hi-Ni/NC-900°C.

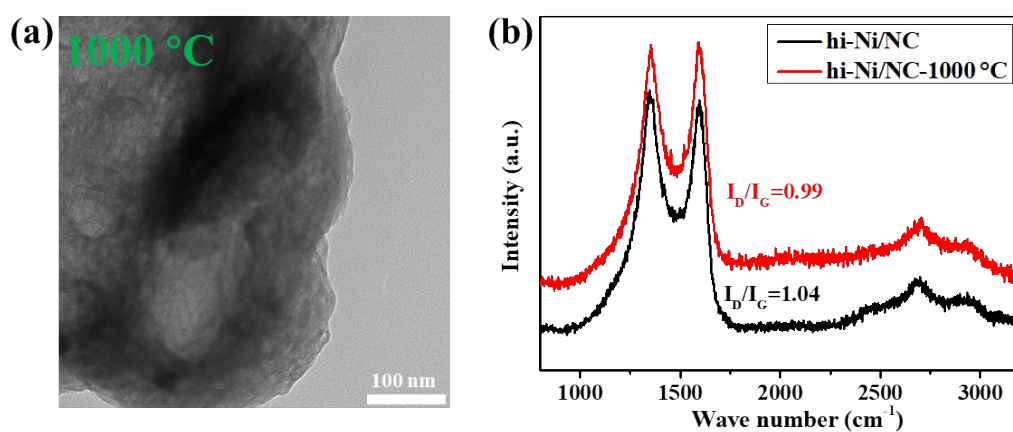

**Fig. S4** (a) The TEM image hi-Ni/NC-1000 °C; (b) Raman spectra of hi-Ni/NC and hi-Ni/NC-1000 °C

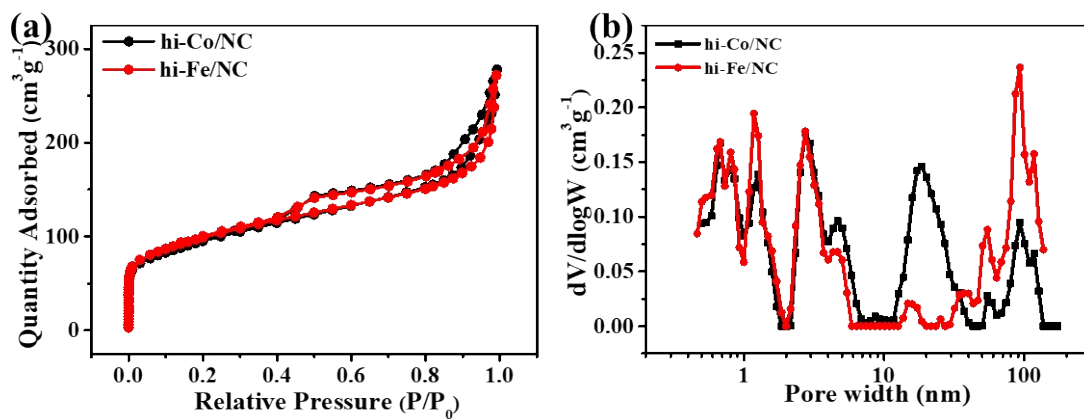

Fig. S5 The N<sub>2</sub> adsorption-desorption isotherms (a) and the pore size distribution (b) of hi-Co/NC, hi-Fe/NC.

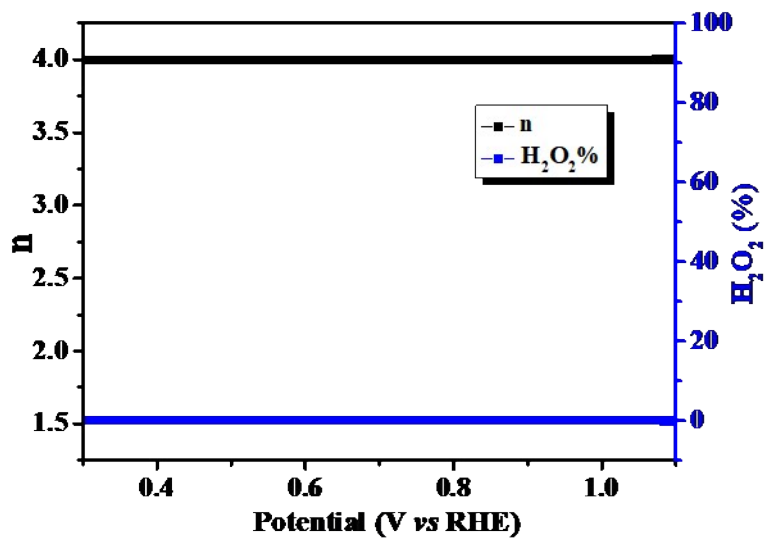

Fig. S6. The electron transfer number and H<sub>2</sub>O<sub>2</sub>% of hi-Fe/NC.

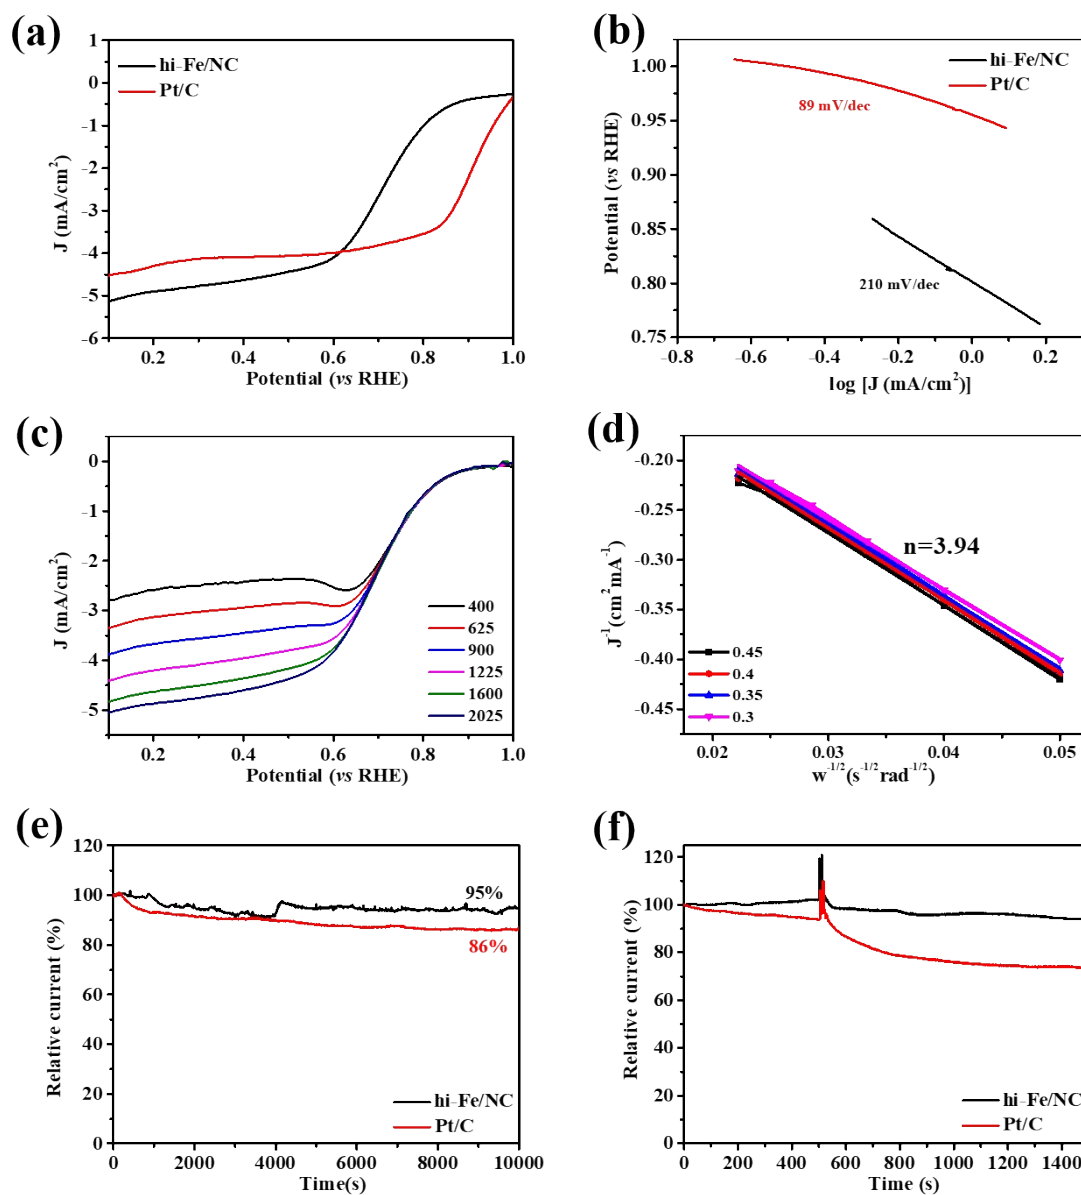

**Fig. S7** The LSV curves of hi-Fe/NC and Pt/C in 0.1 M HClO<sub>4</sub> solution at the rotation rate of 1600 rpm (a); the Tafel plots (b); the LSV curves at the different rotation rates from 400 rpm to 2025 rpm (c); the electron transfer number (d); the i-t curves (e); and the methanol tolerance (f) of hi-Fe/NC.

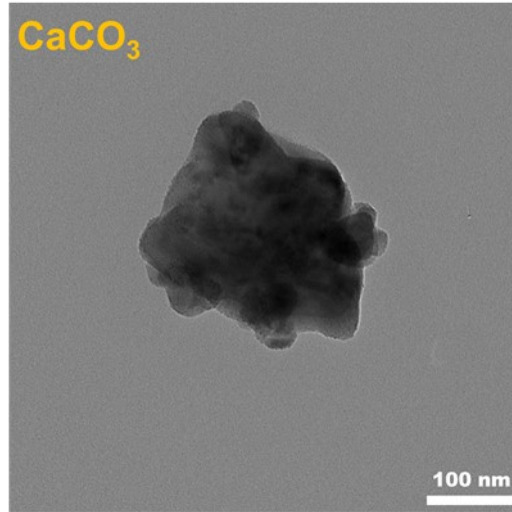

Fig. S8 The TEM image of CaCO<sub>3</sub> template.

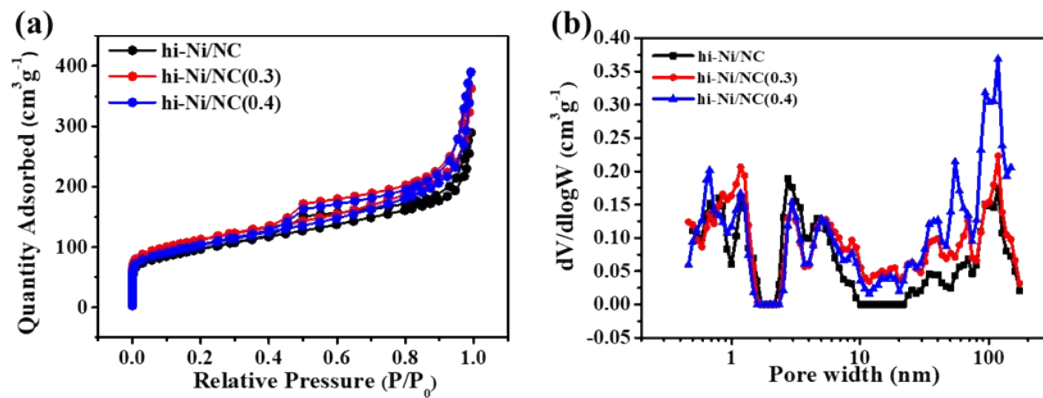

Fig. S9 The N<sub>2</sub> adsorption-desorption isotherms (a) and the pore size distribution (b) of hi-Ni/NC with different shell thickness.

As can be seen from Fig. S9, the N<sub>2</sub> adsorption-desorption isotherms and the pore size plots on three samples are almost same. No obvious relationship between the mesopore size and shell thickness of hi-Ni/NC

**Table S1.** Physico-chemical properties of the hierarchical porous carbons.

|                       | Surface Area<br>(m <sup>2</sup> /g) | Micropore Area (m <sup>2</sup> /g) | Mesopore Area (m <sup>2</sup> /g) | Pore Volume (m <sup>3</sup> /g) |
|-----------------------|-------------------------------------|------------------------------------|-----------------------------------|---------------------------------|
| hi-NC                 | 132.7                               | 105.2                              | 44.9                              | 0.18                            |
| hi-Ni /NC-1           | 249.5                               | 201.9                              | 129.1                             | 0.29                            |
| hi-Ni /NC-2           | 281.8                               | 229.5                              | 171.1                             | 0.35                            |
| hi-Ni/NC-3 (hi-Ni/NC) | 340.4                               | 251.0                              | 220.3                             | 0.44                            |
| hi-Ni/NC-700°C        | 194.4                               | 151.4                              | 68.4                              | 0.22                            |
| hi-Ni/NC-800°C        | 343.3                               | 235.5                              | 231.8                             | 0.5                             |
| ho-Ni/NC              | 291.1                               | 255.3                              | 49.0                              | 0.25                            |

**Table S2.** The Ni amount of the hierarchical porous carbon.

|        | hi-NC | hi-NC-1  | hi-NC-2  | hi-NC-3 |
|--------|-------|----------|----------|---------|
| Ni wt% | 0 wt% | 0.68 wt% | 0.75 wt% | 1.0 wt% |

**Table S3.** Comparison of the ORR activities of the obtained hi-Fe/NC with previously reported Fe-based catalysts.

| Catalyst       | Electrolyte | $E_{1/2}$<br>(V vs.<br>RHE) | Reference                                         |
|----------------|-------------|-----------------------------|---------------------------------------------------|
| FeSA-N-C       | 0.1 M KOH   | 0.891                       | <i>Angew. Chem. Int. Ed.</i> 2018, 57, 8525.      |
| Fe-SAs/NSC     | 0.1 M KOH   | 0.87                        | <i>J. Am. Chem. Soc.</i> 2019, 141, 20118.        |
| AC@f-FeCoNC900 | 0.1 M KOH   | 0.89                        | <i>Energy Environ. Sci.</i> 2019, 12, 1317.       |
| Fe-N-C HNSs    | 0.1 M KOH   | 0.87                        | <i>Adv. Mater.</i> 2019, 31, 1806312.             |
| Fe-N-C/FeN     | 0.1 M KOH   | 0.81                        | <i>Nano-Micro Lett.</i> 2020, 12, 163.            |
| Fe-N-C/N-OMC   | 0.1 M KOH   | 0.93                        | <i>Appl. Catal. B-Environ.</i> 2020, 280, 119411. |
| meso-Fe-N-C    | 0.1 M KOH   | 0.846                       | <i>ACS Catal.</i> 2021, 11, 74-81.                |
| Fe-N-C SA/HCF  | 0.1 M KOH   | 0.802                       | <i>Small.</i> 2020, 16, 1905920.                  |
| hi-Fe/NC       | 0.1 M KOH   | 0.93                        | [This work]                                       |
